# Supplementary material
Source: PubMed Central journal article supplement (PMC3462355)
Supplement: NIHMS405056-supplement-supplement_1.pdf [file NIHMS405056-supplement-supplement_1.pdf]

**G PROTEIN RECEPTOR KINASE 4 (GRK4) POLYMORPHISMS: BETA-BLOCKER  
PHARMACOGENETICS AND TREATMENT RELATED OUTCOMES IN HYPERTENSION**

**Supplemental Material**

**Authors:**

Vandell, Alexander G.<sup>1</sup>, Lobmeyer, Maximilian T.<sup>1</sup>, Gawronski, Brian E.<sup>1</sup>, Langae, Taimour Y.<sup>1</sup>,  
Gong, Yan<sup>1</sup>, Gums, John G.<sup>1,2</sup>, Beitelshes, Amber L.<sup>3</sup>, Turner, Stephen T.<sup>4</sup>, Chapman, Arlene B.<sup>5</sup>,  
Cooper-DeHoff, Rhonda M.<sup>1,6</sup>, Bailey, Kent R.<sup>4</sup>, Boerwinkle, Eric<sup>7</sup>, Pepine, Carl J.<sup>1,6</sup>, Liggett,  
Stephen B.<sup>8</sup>, Johnson, Julie A.<sup>1,6</sup>

**Table S1. Variant allele frequencies**

|                              | <b>GRK4 R65L</b>     | <b>GRK4 A142V</b>    | <b>GRK4 A486V</b>    | <b>ADRB1</b>       |
|------------------------------|----------------------|----------------------|----------------------|--------------------|
|                              | <b>(T allele)</b>    | <b>(T allele)</b>    | <b>(T allele)</b>    | <b>R389G</b>       |
|                              |                      |                      |                      | <b>(G allele)</b>  |
| <b>PEAR</b>                  |                      |                      |                      |                    |
| African Americans (YRI, ASW) | 0.49 (0.54,<br>0.57) | 0.62 (0.65,<br>0.56) | 0.14 (0.10,<br>0.10) | 0.41<br>(0.41,n/a) |
| Caucasians (CEU)             | 0.34 (0.38)          | 0.36 (0.40)          | 0.42 (0.39)          | 0.26 (0.32)        |
| <b>INVEST</b>                |                      |                      |                      |                    |
| African Americans (YRI, ASW) | 0.40 (0.54,<br>0.57) | 0.55 (0.65,<br>0.56) | 0.12 (0.10,<br>0.10) | 0.38<br>(0.41,n/a) |
| Caucasians (CEU)             | 0.34 (0.38)          | 0.36 (0.40)          | 0.39 (0.39)          | 0.27 (0.32)        |
| Hispanics (MEX*)             | 0.33 (0.39)          | 0.38 (0.39)          | 0.34 (0.42)          | 0.30 (n/a)         |

The variant allele corresponding to GRK4 65L, 142V, 486V, and ADRB1 389G is indicated.

Variant allele frequencies are listed in the table. Number in parenthesis are from HapMap 3 Data: Yoruba in Idaban, Nigeria (YRI), African Ancestry in the Southwest UAS (ASW), Utah residents with ancestry from northern and western Europe (CEU), and Mexican ancestry in Los Angeles CA (MEX). \*Note – the Hispanics in INVEST were mostly from Puerto Rico, whose inhabitants have different ancestry/admixture than those from Mexico. n/a, not available.



Table S2. BP response by GRK4 genotype in PEAR.

|              |     | Combined     |              |              |                    |
|--------------|-----|--------------|--------------|--------------|--------------------|
| Drug Therapy |     | R65R         | R65L         | L65L         | P <sub>trend</sub> |
| Atenolol     | n   | 142          | 171          | 62           |                    |
|              | SBP | -9.9 ± 10.3  | -6.8 ± 10.4  | -5.9 ± 11.3  | 0.0880             |
|              | DBP | -9.5 ± 6.7   | -6.7 ± 7.2   | -6.1 ± 6.4   | <b>0.0233*</b>     |
| HCTZ         | n   | 130          | 165          | 70           |                    |
|              | SBP | -8.6 ± 8.9   | -10.3 ± 9.2  | -7.6 ± 7.6   | 0.2761             |
|              | DBP | -4.8 ± 6.3   | -5.9 ± 5.8   | -4.4 ± 5.5   | 0.4234             |
|              |     | <b>A142A</b> | <b>A142V</b> | <b>V142V</b> |                    |
| Atenolol     | n   | 128          | 163          | 87           |                    |
|              | SBP | -10.4 ± 9.8  | -7.8 ± 10.7  | -4.1 ± 10.3  | <b>0.0461*</b>     |
|              | DBP | -9.8 ± 6.6   | -7.3 ± 7.3   | -5.1 ± 6.2   | <b>0.0170*</b>     |
| HCTZ         | n   | 105          | 172          | 95           |                    |
|              | SBP | -8.5 ± 9.5   | -9.7 ± 8.8   | -9.7 ± 8.9   | 0.8195             |
|              | DBP | -4.5 ± 5.9   | -5.7 ± 5.8   | -5.9 ± 6.2   | 0.5757             |
|              |     | <b>A486A</b> | <b>A486V</b> | <b>V486V</b> |                    |
| Atenolol     | n   | 193          | 136          | 51           |                    |
|              | SBP | -7.0 ± 10.7  | -8.1 ± 10.2  | -10.3 ± 10.9 | 0.3097             |
|              | DBP | -7.3 ± 7.1   | -7.8 ± 6.9   | -8.5 ± 6.9   | <b>0.0133*</b>     |
| HCTZ         | n   | 181          | 149          | 42           |                    |

|                   |            |              |              |              |                          |
|-------------------|------------|--------------|--------------|--------------|--------------------------|
|                   | <b>SBP</b> | -10.2 ± 9.2. | -8.8 ± 9.2   | -8.0 ± 7.4   | 0.4429                   |
|                   | <b>DBP</b> | -6.1 ± 6.3   | -5.1 ± 5.9   | -3.6 ± 3.9   | 0.1890                   |
| <b>Caucasians</b> |            |              |              |              |                          |
|                   |            | <b>R65R</b>  | <b>R65L</b>  | <b>L65L</b>  | <b>P<sub>trend</sub></b> |
| <b>Atenolol</b>   | <b>n</b>   | 109          | 88           | 32           |                          |
|                   | <b>SBP</b> | -11.6 ± 9.7  | -10.1 ± 9.2  | -11.0 ± 9.2  | 0.2546                   |
|                   | <b>DBP</b> | -10.7 ± 6.2  | -9.2 ± 6.5   | -9.0 ± 6.3   | 0.0690                   |
| <b>HCTZ</b>       | <b>n</b>   | 97           | 96           | 33           |                          |
|                   | <b>SBP</b> | -7.0 ± 8.2   | -8.6 ± 7.6   | -7.0 ± 9.5   | 0.8588                   |
|                   | <b>DBP</b> | -3.9 ± 5.9   | -4.9 ± 4.6   | -3.3 ± 5.0   | 0.7955                   |
|                   |            | <b>A142A</b> | <b>A142V</b> | <b>V142V</b> |                          |
| <b>Atenolol</b>   | <b>n</b>   | 104          | 99           | 28           |                          |
|                   | <b>SBP</b> | -11.5 ± 9.8  | -10.2 ± 9.3  | -10.8 ± 8.9  | 0.4039                   |
|                   | <b>DBP</b> | -10.8 ± 6.2  | -9.2 ± 6.6   | -8.6 ± 5.8   | 0.0572                   |
| <b>HCTZ</b>       | <b>n</b>   | 87           | 99           | 39           |                          |
|                   | <b>SBP</b> | -7.8 ± 8.8   | -8.2 ± 7.5   | -6.2 ± 8.5   | 0.5455                   |
|                   | <b>DBP</b> | -4.0 ± 5.6   | -4.7 ± 5.3   | -3.5 ± 5.0   | 0.9674                   |
|                   |            | <b>A486A</b> | <b>A486V</b> | <b>V486V</b> |                          |
| <b>Atenolol</b>   | <b>n</b>   | 83           | 101          | 49           |                          |
|                   | <b>SBP</b> | -12.2 ± 8.9  | -10.1 ± 9.1  | -10.3 ± 10.6 | 0.1560                   |
|                   | <b>DBP</b> | -11.1 ± 6.0  | -9.4 ± 6.3   | -8.6 ± 6.9   | <b>0.0143*</b>           |
| <b>HCTZ</b>       | <b>n</b>   | 76           | 111          | 38           |                          |

|                          |            |              |              |              |                          |
|--------------------------|------------|--------------|--------------|--------------|--------------------------|
|                          | <b>SBP</b> | -7.7 ± 8.1   | -7.7 ± 8.6   | -7.7 ± 7.4   | 0.7177                   |
|                          | <b>DBP</b> | -3.9 ± 5.1   | -4.7 ± 5.9   | -3.4 ± 3.7   | 0.8449                   |
| <b>African Americans</b> |            |              |              |              |                          |
|                          |            | <b>R65R</b>  | <b>R65L</b>  | <b>L65L</b>  | <b>P<sub>trend</sub></b> |
| <b>Atenolol</b>          | <b>n</b>   | 33           | 83           | 30           |                          |
|                          | <b>SBP</b> | -5.3 ± 10.5  | -3.3 ± 10.5  | -0.6 ± 11.0  | 0.1073                   |
|                          | <b>DBP</b> | -6.0 ± 6.8   | -3.9 ± 7.0   | -3.0 ± 5.1   | 0.1218                   |
| <b>HCTZ</b>              | <b>n</b>   | 33           | 69           | 37           |                          |
|                          | <b>SBP</b> | -11.8 ± 9.0  | -12.8 ± 10.5 | -9.2 ± 7.9   | 0.1446                   |
|                          | <b>DBP</b> | -7.3 ± 6.4   | -7.2 ± 6.9   | -5.9 ± 6.2   | 0.3388                   |
|                          |            | <b>A142A</b> | <b>A142V</b> | <b>V142V</b> |                          |
| <b>Atenolol</b>          | <b>n</b>   | 24           | 64           | 59           |                          |
|                          | <b>SBP</b> | -5.6 ± 8.9   | -4.6 ± 11.9  | -0.9 ± 9.5   | <b>0.0356*</b>           |
|                          | <b>DBP</b> | -5.9 ± 6.9   | -4.4 ± 7.3   | -3.4 ± 5.7   | 0.1420                   |
| <b>HCTZ</b>              | <b>n</b>   | 18           | 73           | 56           |                          |
|                          | <b>SBP</b> | -11.3 ± 12.9 | -11.6 ± 9.8  | -12.0 ± 8.7  | 0.8873                   |
|                          | <b>DBP</b> | -6.1 ± 7.8   | -6.7 ± 6.3   | -7.5 ± 6.7   | 0.5358                   |
|                          |            | <b>A486A</b> | <b>A486V</b> | <b>V486V</b> |                          |
| <b>Atenolol</b>          | <b>n</b>   | 110          | 35           | 2            |                          |
|                          | <b>SBP</b> | -3.5 ± 10.3  | -2.3 ± 11.3  | -11.0 ± 23.9 | 0.7028                   |
|                          | <b>DBP</b> | -4.7 ± 6.5   | -2.8 ± 6.8   | -5.5 ± 10.6  | 0.3082                   |
| <b>HCTZ</b>              | <b>n</b>   | 105          | 38           | 4            |                          |

---

|            |             |              |            |                |
|------------|-------------|--------------|------------|----------------|
| <b>SBP</b> | -11.9 ± 9.7 | -11.7 ± 10.3 | -7.9 ± 6.5 | 0.2789         |
| <b>DBP</b> | -7.4 ± 6.8  | -5.9 ± 6.1   | -3.8 ± 5.9 | <b>0.0282*</b> |

---

Table S3. BP response by GRK4 R65L-A142V haplotype in PEAR.

|              |     | Combined                |                       |                         |                    |
|--------------|-----|-------------------------|-----------------------|-------------------------|--------------------|
| Drug Therapy |     | 0 Copies of<br>65R-142A | 1 copy of<br>65R-142A | 2 Copies of<br>65R-142A | P <sub>trend</sub> |
| Atenolol     | n   | 105                     | 163                   | 112                     |                    |
|              | SBP | -4.8 ± 10.4             | -7.8 ± 10.5           | -10.9 ± 9.9             | 0.0911             |
|              | DBP | -5.5 ± 6.2              | -7.2 ± 7.3            | -10.4 ± 6.4             | <b>0.0187*</b>     |
| HCTZ         | n   | 187                     | 127                   | 108                     |                    |
|              | SBP | -9.4 ± 8.8              | -10.0 ± 9.9           | -8.2 ± 9.4              | 0.5238             |
|              | DBP | -5.4 ± 6.2              | -5.9 ± 5.8            | -4.4 ± 5.9              | 0.6873             |
|              |     | 0 Copies of<br>65L-142V | 1 copy of<br>65L-142V | 2 Copies of<br>65L-142V | P <sub>trend</sub> |
| Atenolol     | n   | 161                     | 175                   | 44                      |                    |
|              | SBP | -9.5 ± 10.1             | -7.0 ± 10.5           | -4.7 ± 11.5             | <b>0.0204*</b>     |
|              | DBP | -9.1 ± 6.8              | -6.8 ± 7.1            | -5.3 ± 6.4              | <b>0.0088*</b>     |
| HCTZ         | n   | 142                     | 181                   | 50                      |                    |
|              | SBP | -8.8 ± 9.1              | -10.3 ± 9.1           | -7.7 ± 7.9              | 0.4586             |
|              | DBP | -4.9 ± 6.3              | -5.8 ± 5.8            | -5.1 ± 5.5              | 0.9144             |
|              |     | Caucasians              |                       |                         |                    |
|              |     | 0 Copies of<br>65R-142A | 1 copy of<br>65R-142A | 2 Copies of<br>65R-142A | P <sub>trend</sub> |



|                          |            |                    |                  |                    |                          |
|--------------------------|------------|--------------------|------------------|--------------------|--------------------------|
| <b>Atenolol</b>          | <b>n</b>   | 37                 | 97               | 99                 |                          |
|                          | <b>SBP</b> | -11.3 ± 8.9        | -9.9 ± 9.1       | -11.6 ± 9.9        | 0.4157                   |
|                          | <b>DBP</b> | -9.1 ± 6.1         | -9.2 ± 6.4       | -10.8 ± 6.3        | 0.0622                   |
| <b>HCTZ</b>              | <b>n</b>   | 46                 | 100              | 80                 |                          |
|                          | <b>SBP</b> | -6.8 ± 9.6         | -8.5 ± 7.4       | -7.2 ± 8.2         | 0.5494                   |
|                          | <b>DBP</b> | -3.3 ± 5.4         | -5.1 ± 5.1       | -3.7 ± 5.4         | 0.6632                   |
|                          |            | <b>0 Copies of</b> | <b>1 copy of</b> | <b>2 Copies of</b> | <b>P<sub>trend</sub></b> |
|                          |            | <b>65L-142V</b>    | <b>65L-142V</b>  | <b>65L-142V</b>    |                          |
| <b>Atenolol</b>          | <b>n</b>   | 117                | 93               | 23                 |                          |
|                          | <b>SBP</b> | -11.6 ± 9.5        | -10.1 ± 9.4      | -10.3 ± 9.3        | 0.2121                   |
|                          | <b>DBP</b> | -10.7 ± 6.1        | -9.2 ± 6.7       | -8.3 ± 5.9         | 0.0589                   |
| <b>HCTZ</b>              | <b>n</b>   | 105                | 95               | 26                 |                          |
|                          | <b>SBP</b> | -7.6 ± 8.7         | -8.2 ± 7.7       | -6.2 ± 7.7         | 0.8607                   |
|                          | <b>DBP</b> | -4.1 ± 6.0         | -4.7 ± 4.8       | -3.5 ± 4.2         | 0.8482                   |
| <b>African Americans</b> |            |                    |                  |                    |                          |
|                          |            | <b>0 Copies of</b> | <b>1 copy of</b> | <b>2 Copies of</b> | <b>P<sub>trend</sub></b> |
|                          |            | <b>65R-142A</b>    | <b>65R-142A</b>  | <b>65R-142A</b>    |                          |
| <b>Atenolol</b>          | <b>n</b>   | 68                 | 66               | 13                 |                          |
|                          | <b>SBP</b> | -1.4 ± 9.7         | -4.6 ± 11.6      | -6.4 ± 9.5         | 0.0764                   |
|                          | <b>DBP</b> | -3.7 ± 5.5         | -4.2 ± 7.6       | -7.7 ± 6.0         | 0.1382                   |
| <b>HCTZ</b>              | <b>n</b>   | 69                 | 64               | 14                 |                          |

|                 |            | <b>0 Copies of<br/>65L-142V</b> | <b>1 copy of<br/>65L-142V</b> | <b>2 Copies of<br/>65L-142V</b> | <b>P<sub>trend</sub></b> |
|-----------------|------------|---------------------------------|-------------------------------|---------------------------------|--------------------------|
|                 | <b>SBP</b> | -11.3 ± 80.5                    | -12.3 ± 10.5                  | -11.2 ± 12.4                    | 0.7291                   |
|                 | <b>DBP</b> | -6.8 ± 6.5                      | -7.1 ± 6.6                    | -6.5 ± 7.4                      | 0.9841                   |
| <b>Atenolol</b> | <b>n</b>   | 44                              | 82                            | 21                              |                          |
|                 | <b>SBP</b> | -5.2 ± 10.0                     | -3.5 ± 10.7                   | 1.4 ± 10.8                      | <b>0.0270*</b>           |
|                 | <b>DBP</b> | -5.5 ± 6.9                      | -4.2 ± 6.7                    | -2.1 ± 5.3                      | 0.0843                   |
| <b>HCTZ</b>     | <b>n</b>   | 37                              | 86                            | 24                              |                          |
|                 | <b>SBP</b> | -11.8 ± 9.8                     | -12.3 ± 10.1                  | -9.7 ± 8.3                      | 0.2729                   |
|                 | <b>DBP</b> | -7.0 ± 6.8                      | -6.8 ± 6.6                    | -6.9 ± 6.4                      | 0.6524                   |

**Table S4. Risk per variant allele of experiencing the primary outcome by treatment group**

| <b>Nonblacks (Caucasians and Hispanics)</b> |                   |                                |                |
|---------------------------------------------|-------------------|--------------------------------|----------------|
| <b>Genotype</b>                             | <b>Odds Ratio</b> | <b>95% Confidence Interval</b> | <b>P value</b> |
| <b>R65L (All)</b>                           | 1.22              | 0.98-1.52                      | 0.0779         |
| <b>R65L (CCB)</b>                           | 1.25              | 0.92-1.70                      | 0.1507         |
| <b>R65L (BB)</b>                            | 1.22              | 0.88-1.70                      | 0.2383         |
| <b>A142V (All)</b>                          | 1.25              | 1.01-1.54                      | <b>0.0460*</b> |
| <b>A142V (CCB)</b>                          | 1.23              | 0.91-1.65                      | 0.1780         |
| <b>A142V (BB)</b>                           | 1.28              | 0.97-1.77                      | 0.1337         |
| <b>A486V (All)</b>                          | 1.47              | 1.18-1.83                      | <b>0.0005*</b> |
| <b>A486V (CCB)</b>                          | 1.58              | 1.18-2.12                      | <b>0.0024*</b> |
| <b>A486V (BB)</b>                           | 1.32              | 0.95-1.84                      | 0.0973         |

Calcium channel blocker treatment strategy (CCB);  $\beta$ -Blocker strategy (BB)

Figure S1. GRK4 linkage disequilibrium plots.

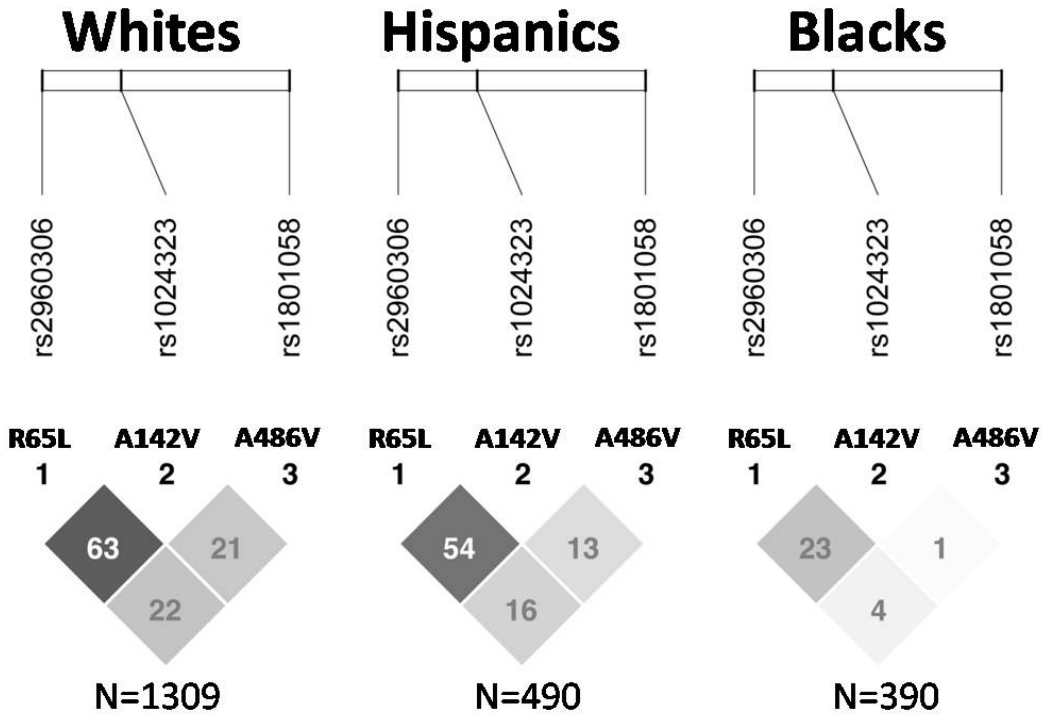

$R^2$  based on pooled samples from PEAR and INVEST is shown for GRK4 SNPs in each of the three race groups examined.
